# Supplementary material
Source: ML conference proceedings conference paper supplement (https://openreview.net/forum?id=WcoX8eJJjI)

PCA

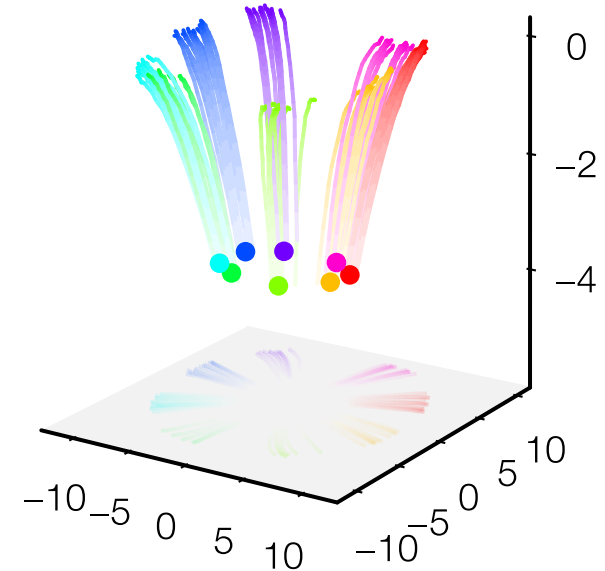

Single neurons

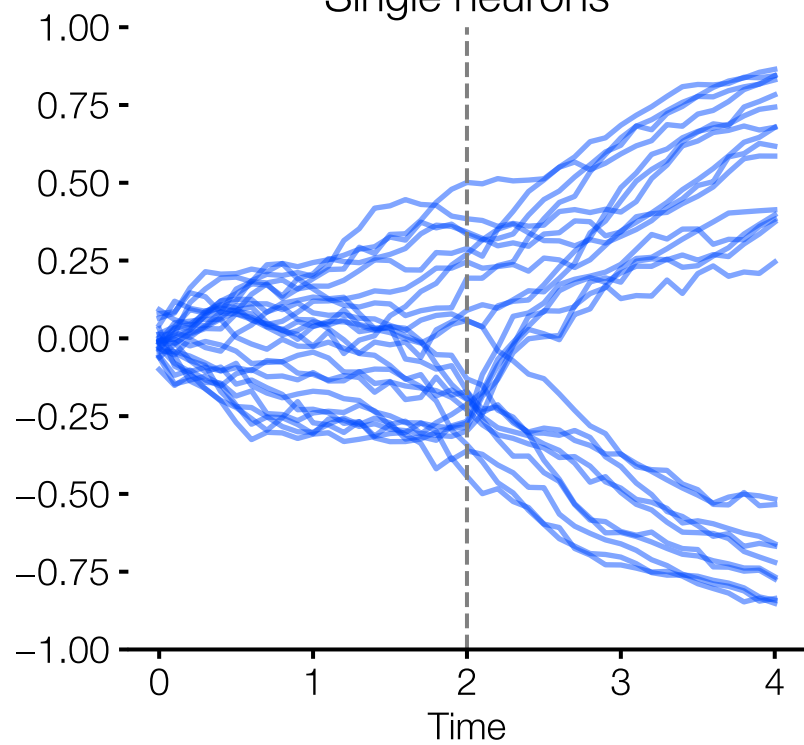

Sorted by peak activity, 1 trial

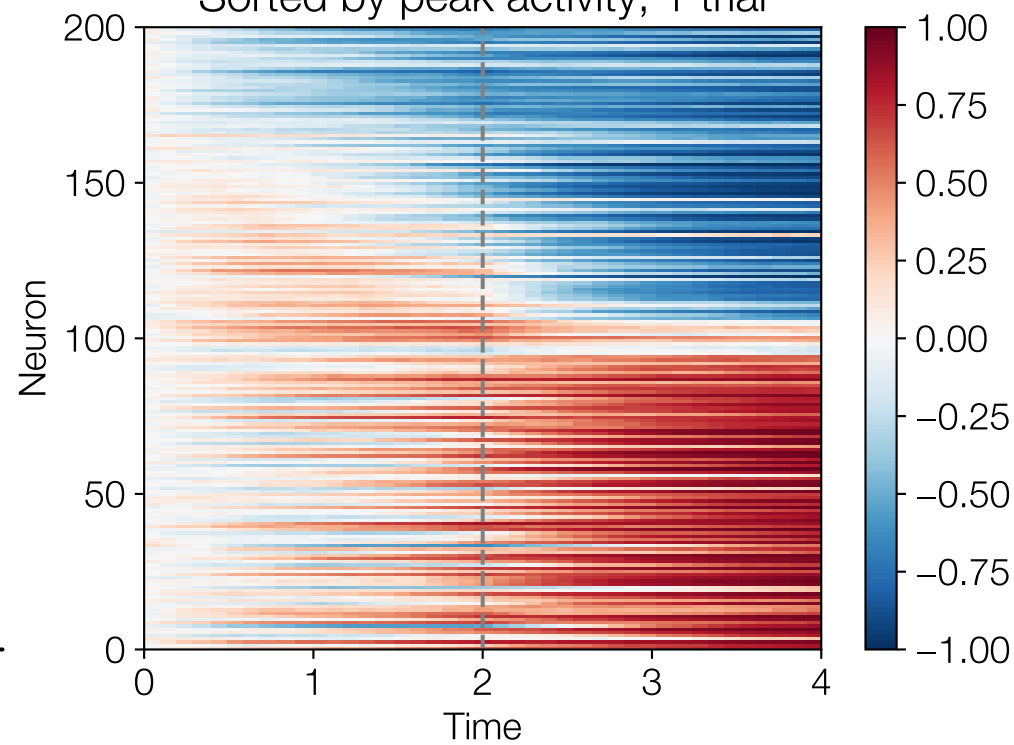

Eigenspectrum

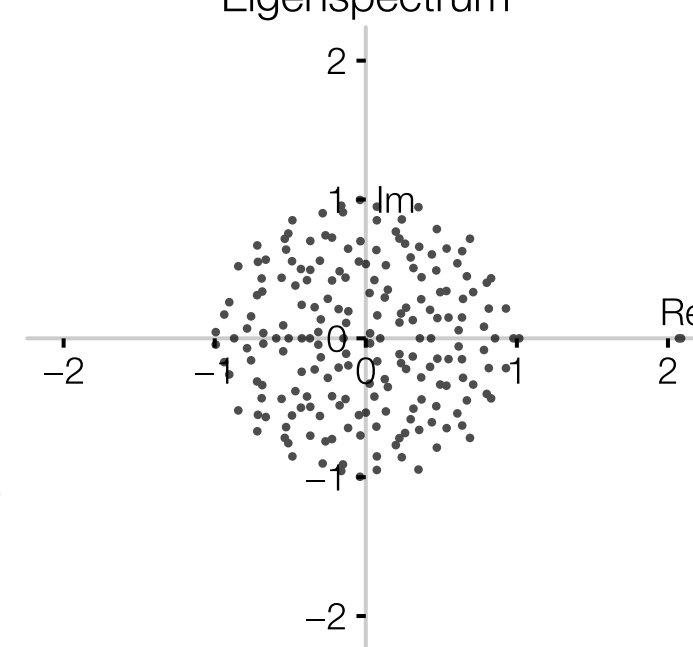

MSE hand to target

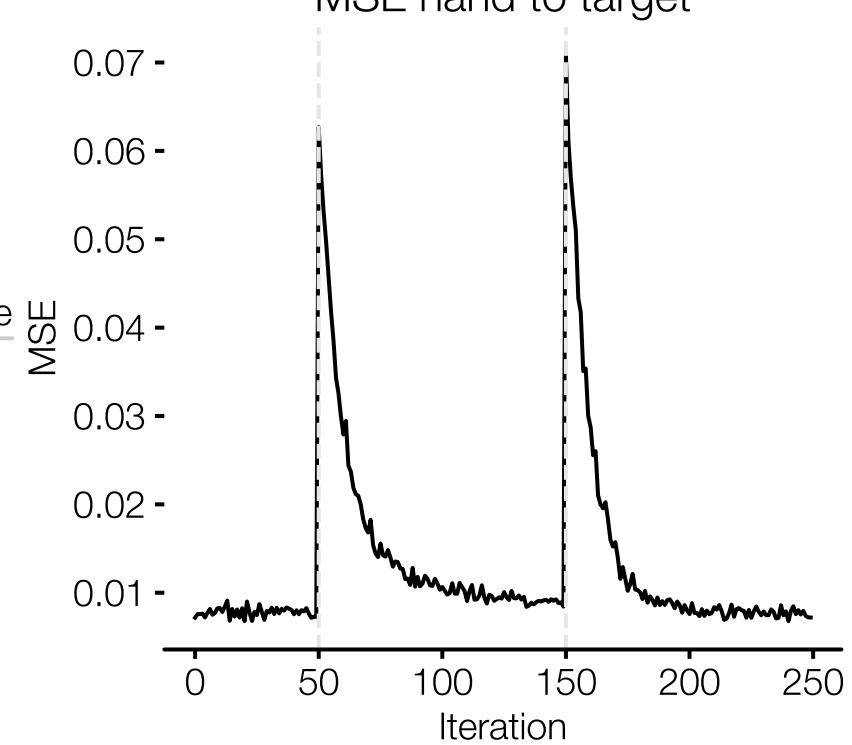

Baseline

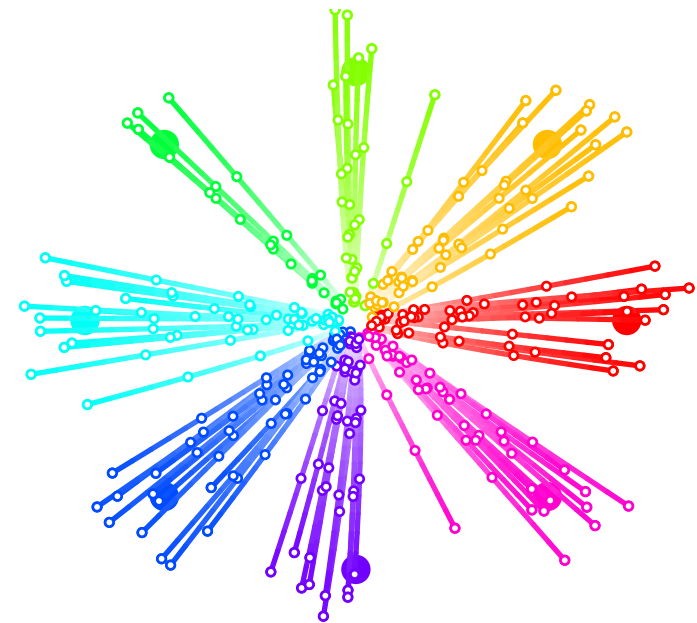

Perturbed - early

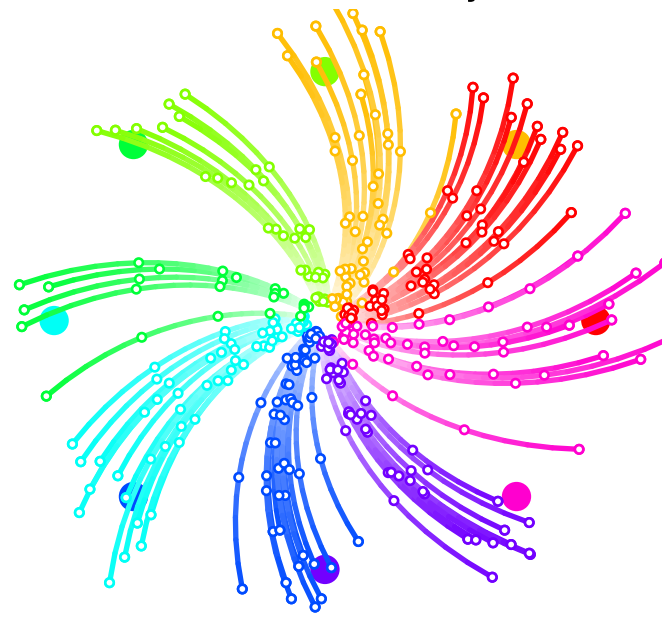

Perturbed - late

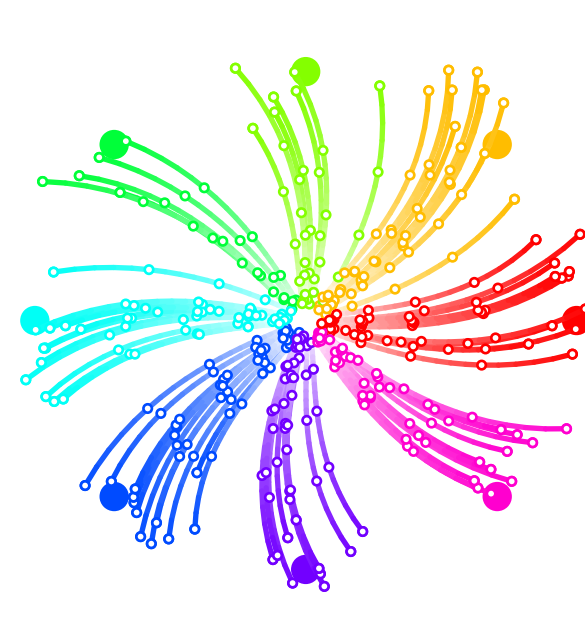

Washout - early

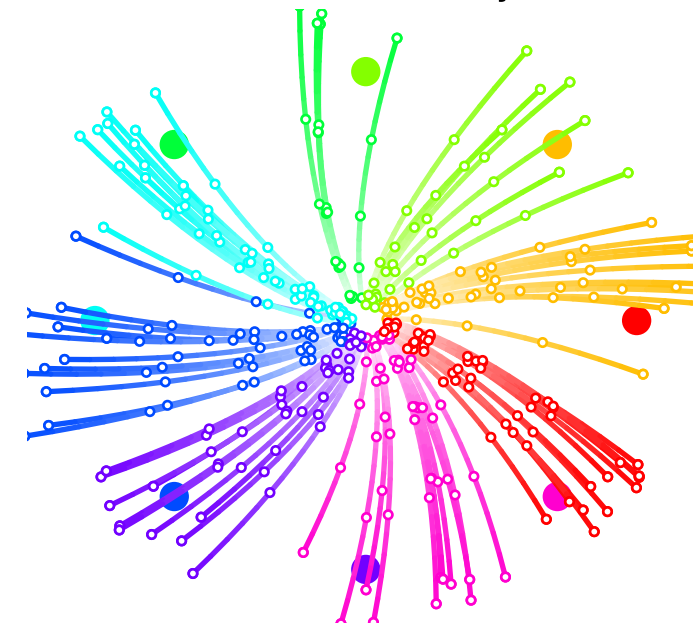

Washout - late

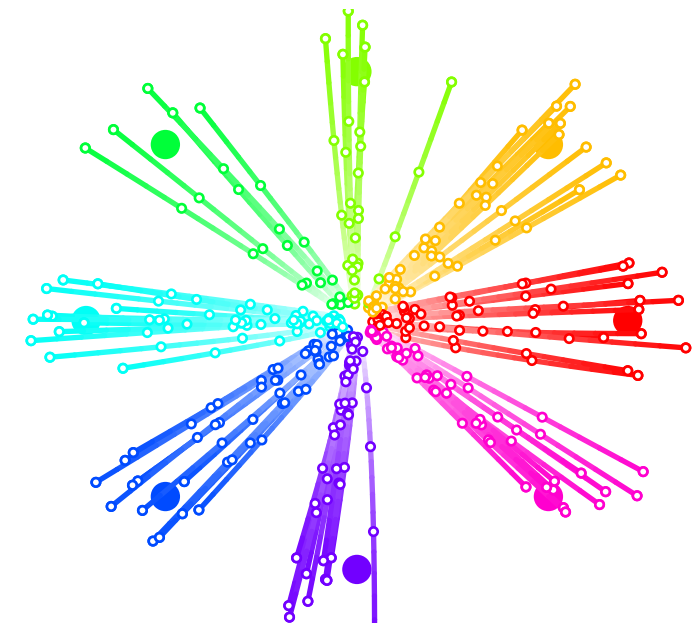

Supplement: supplementary_material [file attachment]
